# Supplementary material
Source: publisher figshare collection journal article supplement (https://acs.figshare.com/ndownloader/files/3845869)
Supplement: Supplementary file 1 [file 3845869]

data_publication_text
_publ_contact_author_name        'Dr. Jubaraj Bikash Baruah'
_publ_contact_author_address    
;Department of Chemistry 
Indian Institute of Technology Guwahati
Assam 781039
India 
;
_publ_contact_author_email       juba@iitg.ernet.in
_publ_contact_author_phone       03612582311

loop_
_publ_author_name             'Jubaraj B. Baruah, Jayanta K. Nath'
_publ_author_address
;Department of Chemistry 
Indian Institute of Technology Guwahati
Assam 781039
India 
; 

 
data_L.I 
 
_audit_creation_method            SHELXL-97 
_chemical_name_systematic 
; 
 ? 
; 
_chemical_name_common             ? 
_chemical_melting_point           ? 
_chemical_formula_moiety          '2(C18 H14 N3 O4), C H4 O, 2(I)' 
_chemical_formula_sum 
 'C37 H32 I2 N6 O9' 
_chemical_formula_weight          958.49 
 
loop_ 
 _atom_type_symbol 
 _atom_type_description 
 _atom_type_scat_dispersion_real 
 _atom_type_scat_dispersion_imag 
 _atom_type_scat_source 
 'C'  'C'   0.0033   0.0016 
 'International Tables Vol C Tables 4.2.6.8 and 6.1.1.4' 
 'H'  'H'   0.0000   0.0000 
 'International Tables Vol C Tables 4.2.6.8 and 6.1.1.4' 
 'N'  'N'   0.0061   0.0033 
 'International Tables Vol C Tables 4.2.6.8 and 6.1.1.4' 
 'O'  'O'   0.0106   0.0060 
 'International Tables Vol C Tables 4.2.6.8 and 6.1.1.4' 
 'I'  'I'  -0.4742   1.8119 
 'International Tables Vol C Tables 4.2.6.8 and 6.1.1.4' 
 
_symmetry_cell_setting            'Monoclinic' 
_symmetry_space_group_name_H-M    'P21'
_space_group_name_Hall            'P 2yb' 
_chemical_absolute_configuration syn

loop_ 
 _symmetry_equiv_pos_as_xyz 
 'x, y, z' 
 '-x, y+1/2, -z' 
 
_cell_length_a                    8.1686(5) 
_cell_length_b                    11.7670(4) 
_cell_length_c                    20.2208(9) 
_cell_angle_alpha                 90.00 
_cell_angle_beta                  98.256(5) 
_cell_angle_gamma                 90.00 
_cell_volume                      1923.48(16) 
_cell_formula_units_Z             2 
_cell_measurement_temperature     296(2) 
_cell_measurement_reflns_used     3062
_cell_measurement_theta_min       3.0477
_cell_measurement_theta_max       28.7948 
 
_exptl_crystal_description        block 
_exptl_crystal_colour             brown 
_exptl_crystal_size_max           0.35 
_exptl_crystal_size_mid           0.27 
_exptl_crystal_size_min           0.20 
_exptl_crystal_density_meas       ? 
_exptl_crystal_density_diffrn     1.655 
_exptl_crystal_density_method     'not measured' 
_exptl_crystal_F_000              948 
_exptl_absorpt_coefficient_mu     1.696 
_exptl_absorpt_correction_type    'multi-scan' 
_exptl_absorpt_correction_T_min   0.583 
_exptl_absorpt_correction_T_max   0.712 
_exptl_absorpt_process_details    'face indexing' 
 
_exptl_special_details 
; 
 ? 
; 
 
_diffrn_ambient_temperature       296(2) 
_diffrn_radiation_wavelength      0.71073 
_diffrn_radiation_type            MoK\a 
_diffrn_radiation_source          'SuperNova (Mo) X-ray Source' 
_diffrn_radiation_monochromator   'mirror' 
_diffrn_measurement_device_type   'SuperNova, Dual, Cu at zero, Eos' 
_diffrn_measurement_method        'phi and omega scans' 
_diffrn_detector_area_resol_mean  ? 
_diffrn_standards_number          none 
_diffrn_standards_interval_count  none
_diffrn_standards_interval_time   none 
_diffrn_standards_decay_%         ? 
_diffrn_reflns_number             3592 
_diffrn_reflns_av_R_equivalents   0.0284 
_diffrn_reflns_av_sigmaI/netI     0.0570 
_diffrn_reflns_limit_h_min        -7 
_diffrn_reflns_limit_h_max        9 
_diffrn_reflns_limit_k_min        -14 
_diffrn_reflns_limit_k_max        13 
_diffrn_reflns_limit_l_min        -24 
_diffrn_reflns_limit_l_max        16 
_diffrn_reflns_theta_min          3.05 
_diffrn_reflns_theta_max          25.25 
_reflns_number_total              3592 
_reflns_number_gt                 2764 
_reflns_threshold_expression      >2sigma(I) 
 
_computing_data_collection        'CrysAlisPro, Agilent Technologies' 
_computing_cell_refinement        'CrysAlisPro, Agilent Technologies'  
_computing_data_reduction         'CrysAlisPro, Agilent Technologies' 
_computing_structure_solution     'SHELXS-97 (Sheldrick, 1990)' 
_computing_structure_refinement   'SHELXL-97 (Sheldrick, 1997)' 
_computing_molecular_graphics     'Bruker SHELXTL'
_computing_publication_material   'Bruker SHELXTL'
 
_refine_special_details 
; 
 Refinement of F^2^ against ALL reflections.  The weighted R-factor wR and 
 goodness of fit S are based on F^2^, conventional R-factors R are based 
 on F, with F set to zero for negative F^2^. The threshold expression of 
 F^2^ > 2sigma(F^2^) is used only for calculating R-factors(gt) etc. and is 
 not relevant to the choice of reflections for refinement.  R-factors based 
 on F^2^ are statistically about twice as large as those based on F, and R- 
 factors based on ALL data will be even larger. 

DFIX 1.44 0.02 C37 N7  N7 C38
DFIX 0.84 0.02 O9 H9A
DFIX 0.84 0.02 H5A N5
DFIX 1.39 0.02 C37 O9
DFIX 1.39 0.02 C37 O9
DFIX 1.39 0.02 C37 O9
DFIX 1.39 0.02 C37 O9
DFIX 0.84 0.02 H9A O9  H2M N2  N5 H5A
DFIX 0.84 0.02 O6 H6A
DFIX 0.85 0.02 H9A O9
DFIX 0.93 0.02 C20 H20  H1 C1  C2 H2
DFIX 0.84 0.02 H1A N1
DFIX 0.84 0.02 N1 H1A
DFIX 0.84 0.02 H1A N1
DFIX 1.36 0.02 O2 C6  O6 C24
DFIX 1.34 0.02 C24 O6  C6 O2
DFIX 1.34 0.02 C24 O6  C6 O2
DFIX 1.34 0.02 C24 O6  C6 O2
DFIX 1.34 0.02 C24 O6  C6 O2
DFIX 1.34 0.02 C24 O6  C6 O2
DFIX 1.34 0.02 C24 O6  C6 O2
DFIX 1.34 0.02 C24 O6  C6 O2
DFIX 1.34 0.02 C24 O6  C6 O2
DFIX 0.84 0.02 O2 H2M
DFIX 1.34 0.02 C24 O6  C6 O2
DFIX 1.34 0.02 C24 O6  C6 O2
DFIX 1.34 0.02 C6 O2
DFIX 1.22 0.02 O1 C6
DFIX 1.22 0.02 C6 O1
DFIX 1.22 0.02 O1 C6
DFIX 1.22 0.02 O1 C6
DFIX 0.84 0.02 H2M O2  O6 H6
DFIX 0.84 0.02 O6 H6  H2M O2
DFIX 0.84 0.02 O2 H2M  O6 H6
DFIX 0.84 0.02 H2M O2
DFIX 0.84 0.02 H2P O2
ISOR 0.01 C37 O9

; 
 
_refine_ls_structure_factor_coef  Fsqd  
_refine_ls_matrix_type            full 
_refine_ls_weighting_scheme       calc  
_refine_ls_weighting_details 
 'calc w=1/[\s^2^(Fo^2^)+(0.0700P)^2^+4.5000P] where P=(Fo^2^+2Fc^2^)/3' 
_atom_sites_solution_primary      direct 
_atom_sites_solution_secondary    difmap 
_atom_sites_solution_hydrogens    geom 
_refine_ls_hydrogen_treatment     constr 
_refine_ls_extinction_method      none 
_refine_ls_extinction_coef        ? 
_refine_ls_abs_structure_details 
 'Flack H D (1983), Acta Cryst. A39, 876-881' 
_refine_ls_abs_structure_Flack    0.2(4) 
_refine_ls_number_reflns          3592 
_refine_ls_number_parameters      481 
_refine_ls_number_restraints      58 
_refine_ls_R_factor_all           0.0646 
_refine_ls_R_factor_gt            0.0550 
_refine_ls_wR_factor_ref          0.1469 
_refine_ls_wR_factor_gt           0.1384 
_refine_ls_goodness_of_fit_ref    1.048 
_refine_ls_restrained_S_all       1.050 
_refine_ls_shift/su_max           0.005 
_refine_ls_shift/su_mean          0.000 
 
loop_ 
 _atom_site_label 
 _atom_site_type_symbol 
 _atom_site_fract_x 
 _atom_site_fract_y 
 _atom_site_fract_z 
 _atom_site_U_iso_or_equiv 
 _atom_site_adp_type 
 _atom_site_occupancy 
 _atom_site_symmetry_multiplicity 
 _atom_site_calc_flag 
 _atom_site_refinement_flags 
 _atom_site_disorder_assembly 
 _atom_site_disorder_group 
C3 C 0.0322(6) 0.5032(6) 0.5052(4) 0.038(3) Uani 1 1 d G . . 
C2 C -0.0242(8) 0.4005(5) 0.4728(3) 0.052(3) Uani 1 1 d GD . . 
H2 H 0.0413 0.3465 0.4556 0.063 Uiso 1 1 calc RD . . 
N1 N -0.1984(8) 0.3947(5) 0.4712(3) 0.049(2) Uani 1 1 d GD . . 
H1A H -0.2618 0.3407 0.4542 0.058 Uiso 1 1 calc RD . . 
C1 C -0.2495(6) 0.4938(6) 0.5027(4) 0.051(3) Uani 1 1 d GD . . 
H1 H -0.3574 0.5117 0.5085 0.061 Uiso 1 1 calc RD . . 
N2 N -0.1070(8) 0.5609(4) 0.5237(3) 0.043(2) Uani 1 1 d G . . 
H2A H -0.1053 0.6251 0.5440 0.052 Uiso 1 1 calc R . . 
I1 I 0.59432(8) 0.76433(6) 0.56129(3) 0.0502(2) Uani 1 1 d . . . 
I2 I 0.79145(10) 0.58662(7) 0.91364(4) 0.0623(2) Uani 1 1 d . . . 
O5 O 0.7644(11) 0.1652(7) 0.1326(4) 0.057(2) Uani 1 1 d . . . 
O3 O 0.5473(9) 0.3990(7) 0.6075(4) 0.055(2) Uani 1 1 d . . . 
O1 O 0.1156(11) 0.6986(6) 0.6189(4) 0.054(2) Uani 1 1 d D . . 
O4 O 0.0184(9) 0.4443(7) 0.6457(4) 0.0498(18) Uani 1 1 d . . . 
O6 O 0.7702(11) 0.2773(6) 0.2221(3) 0.054(2) Uani 1 1 d D . . 
H6 H 0.8350 0.3309 0.2246 0.080 Uiso 1 1 calc RD . . 
N3 N 0.2758(10) 0.4197(6) 0.6203(4) 0.0361(18) Uani 1 1 d . . . 
O7 O 0.3904(10) 0.4887(7) 0.1649(4) 0.057(2) Uani 1 1 d . . . 
C22 C 0.5636(14) 0.3137(10) 0.0466(5) 0.043(3) Uani 1 1 d . . . 
H22A H 0.6589 0.3322 0.0250 0.051 Uiso 1 1 calc R . . 
H22B H 0.5392 0.2336 0.0393 0.051 Uiso 1 1 calc R . . 
C4 C 0.2022(12) 0.5469(9) 0.5218(5) 0.040(2) Uani 1 1 d . . . 
H4A H 0.2028 0.6261 0.5084 0.047 Uiso 1 1 calc R . . 
H4B H 0.2726 0.5057 0.4953 0.047 Uiso 1 1 calc R . . 
O2 O 0.2790(11) 0.6101(7) 0.7029(3) 0.060(2) Uani 1 1 d D . . 
H2B H 0.2387 0.6561 0.7264 0.090 Uiso 1 1 calc R . . 
C24 C 0.7244(13) 0.2505(9) 0.1586(3) 0.041(2) Uani 1 1 d D . . 
C8 C 0.4121(14) 0.2334(9) 0.6373(5) 0.041(3) Uani 1 1 d . . . 
C18 C 0.1320(12) 0.3799(8) 0.6429(4) 0.034(2) Uani 1 1 d . . . 
O8 O 0.8950(9) 0.4192(7) 0.1062(4) 0.0506(18) Uani 1 1 d . . . 
N5 N 0.2596(12) 0.3619(8) 0.0280(4) 0.048(2) Uani 1 1 d D . . 
H5A H 0.2320 0.3059 0.0513 0.058 Uiso 1 1 calc RD . . 
C36 C 0.8031(14) 0.4888(9) 0.1238(5) 0.042(2) Uani 1 1 d . . . 
N6 N 0.6450(10) 0.4549(7) 0.1356(3) 0.0330(17) Uani 1 1 d . . . 
C5 C 0.2787(12) 0.5385(8) 0.5955(4) 0.034(2) Uani 1 1 d . . . 
H5 H 0.3956 0.5589 0.5974 0.041 Uiso 1 1 calc R . . 
C10 C 0.5393(19) 0.0493(11) 0.6476(6) 0.064(4) Uani 1 1 d . . . 
H10 H 0.6307 0.0036 0.6444 0.077 Uiso 1 1 calc R . . 
C7 C 0.4199(13) 0.3550(9) 0.6215(5) 0.041(2) Uani 1 1 d . . . 
C17 C 0.1283(11) 0.2598(10) 0.6621(4) 0.0347(19) Uani 1 1 d . . . 
C6 C 0.2074(13) 0.6213(7) 0.6395(4) 0.044(3) Uani 1 1 d D . . 
C28 C 0.504(2) 0.8370(11) 0.1990(6) 0.064(4) Uani 1 1 d . . . 
H28 H 0.4272 0.8875 0.2121 0.076 Uiso 1 1 calc R . . 
C21 C 0.4173(15) 0.3834(9) 0.0158(5) 0.046(3) Uani 1 1 d . . . 
C25 C 0.5249(14) 0.5248(9) 0.1568(5) 0.043(2) Uani 1 1 d . . . 
C9 C 0.5435(17) 0.1620(11) 0.6322(6) 0.057(3) Uani 1 1 d . . . 
H9 H 0.6378 0.1916 0.6178 0.068 Uiso 1 1 calc R . . 
C12 C 0.2615(14) 0.0718(9) 0.6740(5) 0.045(2) Uani 1 1 d . . . 
C13 C 0.2645(14) 0.1886(9) 0.6571(4) 0.040(2) Uani 1 1 d . . . 
C35 C 0.8408(14) 0.6110(8) 0.1333(5) 0.042(2) Uani 1 1 d . . . 
C27 C 0.4636(16) 0.7213(10) 0.1911(6) 0.053(3) Uani 1 1 d . . . 
H27 H 0.3640 0.6953 0.2026 0.064 Uiso 1 1 calc R . . 
C29 C 0.649(2) 0.8746(10) 0.1880(6) 0.061(4) Uani 1 1 d . . . 
H29 H 0.6763 0.9507 0.1960 0.073 Uiso 1 1 calc R . . 
C32 C 0.9211(18) 0.8387(11) 0.1530(6) 0.062(4) Uani 1 1 d . . . 
H32 H 0.9523 0.9142 0.1605 0.075 Uiso 1 1 calc R . . 
C26 C 0.5677(16) 0.6460(9) 0.1667(5) 0.044(3) Uani 1 1 d . . . 
C31 C 0.7240(15) 0.6836(9) 0.1546(5) 0.041(3) Uani 1 1 d . . . 
C11 C 0.4019(18) 0.0038(10) 0.6677(6) 0.062(4) Uani 1 1 d . . . 
H11 H 0.3997 -0.0734 0.6775 0.074 Uiso 1 1 calc R . . 
C15 C -0.0150(16) 0.0977(12) 0.7014(5) 0.061(3) Uani 1 1 d . . . 
H15 H -0.1071 0.0684 0.7178 0.073 Uiso 1 1 calc R . . 
C34 C 0.9923(17) 0.6512(11) 0.1227(5) 0.055(3) Uani 1 1 d . . . 
H34 H 1.0698 0.6008 0.1100 0.066 Uiso 1 1 calc R . . 
C33 C 1.0322(16) 0.7640(14) 0.1304(5) 0.064(3) Uani 1 1 d . . . 
H33 H 1.1333 0.7903 0.1204 0.077 Uiso 1 1 calc R . . 
N4 N 0.2439(13) 0.5087(8) -0.0311(4) 0.052(2) Uani 1 1 d . . . 
H4 H 0.2051 0.5673 -0.0535 0.063 Uiso 1 1 calc R . . 
C16 C -0.0102(13) 0.2152(10) 0.6835(5) 0.046(2) Uani 1 1 d . . . 
H16 H -0.1013 0.2614 0.6863 0.055 Uiso 1 1 calc R . . 
C23 C 0.6042(14) 0.3365(8) 0.1213(5) 0.038(2) Uani 1 1 d . . . 
H23 H 0.4998 0.3243 0.1388 0.046 Uiso 1 1 calc R . . 
C14 C 0.1166(16) 0.0284(10) 0.6945(6) 0.056(3) Uani 1 1 d . . . 
H14 H 0.1097 -0.0488 0.7035 0.067 Uiso 1 1 calc R . . 
C30 C 0.7607(16) 0.8040(8) 0.1652(5) 0.044(3) Uani 1 1 d . . . 
C20 C 0.4060(16) 0.4765(10) -0.0225(5) 0.052(3) Uani 1 1 d D . . 
H20 H 0.4920 0.5123 -0.0398 0.062 Uiso 1 1 calc RD . . 
C19 C 0.1558(15) 0.4387(12) -0.0009(5) 0.055(3) Uani 1 1 d . . . 
H19 H 0.0425 0.4423 0.0002 0.066 Uiso 1 1 calc R . . 
O9 O 0.132(2) 0.2116(14) 0.2391(8) 0.154(6) Uani 1 1 d DU . . 
H9A H 0.0827 0.1963 0.2020 0.231 Uiso 1 1 calc RD . . 
C37 C 0.184(2) 0.1100(14) 0.2732(7) 0.098(5) Uani 1 1 d DU . . 
H37A H 0.3012 0.1008 0.2741 0.147 Uiso 1 1 calc R . . 
H37B H 0.1274 0.0466 0.2505 0.147 Uiso 1 1 calc R . . 
H37C H 0.1592 0.1136 0.3181 0.147 Uiso 1 1 calc R . . 
 
loop_ 
 _atom_site_aniso_label 
 _atom_site_aniso_U_11 
 _atom_site_aniso_U_22 
 _atom_site_aniso_U_33 
 _atom_site_aniso_U_23 
 _atom_site_aniso_U_13 
 _atom_site_aniso_U_12 
C3 0.058(8) 0.024(5) 0.030(5) -0.004(4) 0.001(5) -0.015(5) 
C2 0.080(9) 0.028(5) 0.044(6) -0.009(5) -0.003(5) 0.006(6) 
N1 0.048(5) 0.034(5) 0.060(5) -0.004(4) -0.007(4) -0.006(5) 
C1 0.053(7) 0.052(7) 0.046(6) 0.019(5) 0.004(5) 0.000(6) 
N2 0.050(5) 0.031(5) 0.051(5) -0.005(4) 0.014(4) 0.009(4) 
I1 0.0522(4) 0.0350(3) 0.0651(4) 0.0026(3) 0.0135(3) 0.0016(4) 
I2 0.0688(5) 0.0464(4) 0.0733(5) -0.0018(4) 0.0157(4) 0.0117(4) 
O5 0.080(6) 0.029(4) 0.057(4) -0.010(3) -0.005(4) 0.012(4) 
O3 0.036(4) 0.050(5) 0.080(5) 0.010(4) 0.011(4) 0.001(4) 
O1 0.071(6) 0.030(4) 0.056(4) -0.001(3) -0.011(4) 0.013(4) 
O4 0.047(4) 0.040(4) 0.064(4) 0.003(4) 0.014(3) 0.014(4) 
O6 0.093(6) 0.024(4) 0.040(4) 0.000(3) -0.004(3) -0.001(4) 
N3 0.042(5) 0.020(4) 0.045(4) 0.005(3) 0.003(3) -0.004(4) 
O7 0.052(5) 0.039(5) 0.079(5) -0.008(4) 0.010(4) -0.005(4) 
C22 0.052(7) 0.032(5) 0.043(6) -0.003(4) 0.001(5) 0.003(5) 
C4 0.036(5) 0.039(6) 0.044(5) -0.002(4) 0.005(4) -0.005(5) 
O2 0.096(6) 0.041(5) 0.039(4) -0.007(3) -0.009(4) 0.012(5) 
C24 0.060(6) 0.023(5) 0.040(5) 0.010(4) 0.009(4) 0.009(5) 
C8 0.049(6) 0.035(6) 0.036(5) -0.002(4) -0.001(4) 0.008(5) 
C18 0.043(6) 0.029(5) 0.031(5) -0.007(4) 0.004(4) 0.002(5) 
O8 0.050(4) 0.035(4) 0.070(5) 0.003(4) 0.018(4) 0.008(4) 
N5 0.056(6) 0.041(5) 0.046(5) 0.014(4) 0.000(4) -0.001(5) 
C36 0.049(6) 0.036(6) 0.037(5) 0.006(4) -0.003(4) 0.000(5) 
N6 0.047(5) 0.022(4) 0.029(4) 0.001(3) 0.003(3) 0.002(4) 
C5 0.033(5) 0.027(5) 0.041(5) -0.003(4) 0.000(4) -0.002(4) 
C10 0.070(9) 0.047(7) 0.069(8) -0.007(6) -0.014(7) 0.020(7) 
C7 0.044(6) 0.039(6) 0.038(5) -0.005(5) -0.005(4) -0.001(5) 
C17 0.041(5) 0.029(4) 0.032(4) 0.000(5) 0.000(3) 0.000(5) 
C6 0.062(7) 0.020(5) 0.045(6) -0.003(4) -0.006(5) -0.013(5) 
C28 0.096(12) 0.036(7) 0.055(7) -0.008(5) -0.003(7) 0.029(8) 
C21 0.063(7) 0.035(6) 0.035(5) -0.002(4) -0.007(5) -0.010(5) 
C25 0.046(6) 0.033(6) 0.049(6) -0.005(5) 0.001(5) 0.007(5) 
C9 0.063(8) 0.050(7) 0.053(6) -0.009(6) -0.004(6) 0.013(6) 
C12 0.065(7) 0.030(5) 0.037(5) -0.004(4) -0.002(4) 0.000(6) 
C13 0.055(7) 0.033(5) 0.030(5) -0.002(4) -0.004(4) -0.006(5) 
C35 0.057(6) 0.028(6) 0.039(5) 0.003(4) -0.002(4) -0.007(5) 
C27 0.053(7) 0.045(7) 0.061(7) -0.007(5) 0.004(5) 0.022(6) 
C29 0.094(11) 0.031(6) 0.052(7) -0.004(5) -0.011(7) 0.006(7) 
C32 0.082(10) 0.036(7) 0.062(7) 0.005(6) -0.013(7) -0.024(7) 
C26 0.069(8) 0.030(5) 0.028(5) -0.002(4) -0.007(5) 0.011(6) 
C31 0.063(7) 0.022(5) 0.036(5) 0.008(4) -0.001(5) -0.003(5) 
C11 0.080(10) 0.030(6) 0.068(7) -0.008(6) -0.015(7) 0.017(6) 
C15 0.068(8) 0.055(8) 0.060(7) 0.008(6) 0.011(6) -0.024(8) 
C34 0.066(8) 0.045(7) 0.053(7) 0.000(5) 0.003(6) -0.001(6) 
C33 0.070(8) 0.062(8) 0.057(6) 0.017(7) -0.001(5) -0.034(9) 
N4 0.070(7) 0.041(5) 0.044(5) 0.009(4) -0.001(4) 0.004(5) 
C16 0.039(6) 0.040(6) 0.055(6) -0.005(5) -0.004(5) -0.006(5) 
C23 0.059(7) 0.021(5) 0.035(5) 0.001(4) 0.009(4) -0.006(5) 
C14 0.073(9) 0.030(6) 0.060(7) 0.011(5) -0.007(6) -0.013(6) 
C30 0.076(8) 0.017(5) 0.037(5) 0.001(4) -0.006(5) -0.011(5) 
C20 0.063(8) 0.049(7) 0.043(6) 0.004(5) 0.010(5) -0.020(6) 
C19 0.050(7) 0.062(8) 0.052(6) 0.010(6) 0.007(5) 0.010(7) 
O9 0.150(9) 0.170(10) 0.147(9) 0.002(8) 0.040(7) 0.049(8) 
C37 0.127(9) 0.095(9) 0.076(7) 0.014(7) 0.024(7) -0.028(8) 
 
_geom_special_details 
; 
 All esds (except the esd in the dihedral angle between two l.s. planes) 
 are estimated using the full covariance matrix.  The cell esds are taken 
 into account individually in the estimation of esds in distances, angles 
 and torsion angles; correlations between esds in cell parameters are only 
 used when they are defined by crystal symmetry.  An approximate (isotropic) 
 treatment of cell esds is used for estimating esds involving l.s. planes. 
; 
 
loop_ 
 _geom_bond_atom_site_label_1 
 _geom_bond_atom_site_label_2 
 _geom_bond_distance 
 _geom_bond_site_symmetry_2 
 _geom_bond_publ_flag 
C3 N2 1.4200 . ? 
C3 C2 1.4200 . ? 
C3 C4 1.473(10) . ? 
C2 N1 1.4200 . ? 
N1 C1 1.4200 . ? 
C1 N2 1.4200 . ? 
O5 C24 1.199(12) . ? 
O3 C7 1.231(13) . ? 
O1 C6 1.213(8) . ? 
O4 C18 1.206(11) . ? 
O6 C24 1.323(5) . ? 
N3 C18 1.402(12) . ? 
N3 C7 1.399(14) . ? 
N3 C5 1.487(12) . ? 
O7 C25 1.211(14) . ? 
C22 C21 1.508(15) . ? 
C22 C23 1.524(13) . ? 
C4 C5 1.536(13) . ? 
O2 C6 1.337(5) . ? 
C24 C23 1.530(14) . ? 
C8 C9 1.378(16) . ? 
C8 C13 1.425(15) . ? 
C8 C7 1.470(16) . ? 
C18 C17 1.466(15) . ? 
O8 C36 1.199(13) . ? 
N5 C19 1.317(15) . ? 
N5 C21 1.370(15) . ? 
C36 N6 1.404(14) . ? 
C36 C35 1.477(15) . ? 
N6 C25 1.394(13) . ? 
N6 C23 1.452(12) . ? 
C5 C6 1.492(13) . ? 
C10 C11 1.36(2) . ? 
C10 C9 1.364(19) . ? 
C17 C16 1.372(14) . ? 
C17 C13 1.408(15) . ? 
C28 C29 1.31(2) . ? 
C28 C27 1.404(19) . ? 
C21 C20 1.337(16) . ? 
C25 C26 1.474(14) . ? 
C12 C14 1.405(17) . ? 
C12 C11 1.419(17) . ? 
C12 C13 1.418(15) . ? 
C35 C34 1.371(17) . ? 
C35 C31 1.395(16) . ? 
C27 C26 1.368(16) . ? 
C29 C30 1.361(18) . ? 
C32 C33 1.39(2) . ? 
C32 C30 1.428(19) . ? 
C26 C31 1.405(17) . ? 
C31 C30 1.457(14) . ? 
C15 C14 1.373(18) . ? 
C15 C16 1.431(17) . ? 
C34 C33 1.370(19) . ? 
N4 C19 1.302(15) . ? 
N4 C20 1.365(16) . ? 
O9 C37 1.414(10) . ? 
 
loop_ 
 _geom_angle_atom_site_label_1 
 _geom_angle_atom_site_label_2 
 _geom_angle_atom_site_label_3 
 _geom_angle 
 _geom_angle_site_symmetry_1 
 _geom_angle_site_symmetry_3 
 _geom_angle_publ_flag 
N2 C3 C2 108.0 . . ? 
N2 C3 C4 122.5(6) . . ? 
C2 C3 C4 129.4(6) . . ? 
N1 C2 C3 108.0 . . ? 
C2 N1 C1 108.0 . . ? 
N1 C1 N2 108.0 . . ? 
C3 N2 C1 108.0 . . ? 
C18 N3 C7 123.8(8) . . ? 
C18 N3 C5 118.6(8) . . ? 
C7 N3 C5 117.6(8) . . ? 
C21 C22 C23 111.2(9) . . ? 
C3 C4 C5 116.0(8) . . ? 
O5 C24 O6 124.6(9) . . ? 
O5 C24 C23 122.2(7) . . ? 
O6 C24 C23 113.1(8) . . ? 
C9 C8 C13 119.7(11) . . ? 
C9 C8 C7 121.2(12) . . ? 
C13 C8 C7 119.1(10) . . ? 
O4 C18 N3 119.4(9) . . ? 
O4 C18 C17 123.3(9) . . ? 
N3 C18 C17 117.3(8) . . ? 
C19 N5 C21 110.9(10) . . ? 
O8 C36 N6 119.1(10) . . ? 
O8 C36 C35 125.1(10) . . ? 
N6 C36 C35 115.7(10) . . ? 
C25 N6 C36 126.1(9) . . ? 
C25 N6 C23 118.5(9) . . ? 
C36 N6 C23 115.4(9) . . ? 
N3 C5 C6 112.8(8) . . ? 
N3 C5 C4 111.3(8) . . ? 
C6 C5 C4 113.4(8) . . ? 
C11 C10 C9 120.1(14) . . ? 
O3 C7 N3 120.3(10) . . ? 
O3 C7 C8 121.6(11) . . ? 
N3 C7 C8 118.0(10) . . ? 
C16 C17 C13 119.4(11) . . ? 
C16 C17 C18 120.1(10) . . ? 
C13 C17 C18 120.5(9) . . ? 
O1 C6 O2 124.5(9) . . ? 
O1 C6 C5 124.0(7) . . ? 
O2 C6 C5 110.6(8) . . ? 
C29 C28 C27 120.7(14) . . ? 
C20 C21 N5 105.5(11) . . ? 
C20 C21 C22 132.0(12) . . ? 
N5 C21 C22 122.4(10) . . ? 
O7 C25 N6 121.7(10) . . ? 
O7 C25 C26 121.6(11) . . ? 
N6 C25 C26 116.7(10) . . ? 
C8 C9 C10 122.0(15) . . ? 
C14 C12 C11 123.2(11) . . ? 
C14 C12 C13 117.9(11) . . ? 
C11 C12 C13 118.9(11) . . ? 
C17 C13 C12 121.2(11) . . ? 
C17 C13 C8 120.6(10) . . ? 
C12 C13 C8 118.1(10) . . ? 
C34 C35 C31 120.7(10) . . ? 
C34 C35 C36 119.5(11) . . ? 
C31 C35 C36 119.8(10) . . ? 
C26 C27 C28 121.4(14) . . ? 
C28 C29 C30 121.0(12) . . ? 
C33 C32 C30 122.4(11) . . ? 
C27 C26 C31 119.1(11) . . ? 
C27 C26 C25 121.9(12) . . ? 
C31 C26 C25 119.0(10) . . ? 
C35 C31 C26 122.7(9) . . ? 
C35 C31 C30 120.4(11) . . ? 
C26 C31 C30 117.0(11) . . ? 
C10 C11 C12 121.2(12) . . ? 
C14 C15 C16 119.8(11) . . ? 
C33 C34 C35 121.5(13) . . ? 
C34 C33 C32 119.6(12) . . ? 
C19 N4 C20 110.9(10) . . ? 
C17 C16 C15 120.2(11) . . ? 
N6 C23 C22 112.1(8) . . ? 
N6 C23 C24 115.1(8) . . ? 
C22 C23 C24 113.9(8) . . ? 
C15 C14 C12 121.3(11) . . ? 
C29 C30 C32 124.0(11) . . ? 
C29 C30 C31 120.7(13) . . ? 
C32 C30 C31 115.3(12) . . ? 
C21 C20 N4 106.6(10) . . ? 
N4 C19 N5 106.2(10) . . ? 
 
_diffrn_measured_fraction_theta_max    0.98 
_diffrn_reflns_theta_full              25.25 
_diffrn_measured_fraction_theta_full   0.98 
_refine_diff_density_max    0.937 
_refine_diff_density_min   -0.683 
_refine_diff_density_rms    0.105 
